# Supplementary material for: Bat-borne H9N2 influenza virus evades MxA restriction and exhibits efficient replication and transmission in ferrets
Source: PubMed Central journal article supplement (PMC11045726; doi:10.1038/s41467-024-47455-6), 2024-04-25
Supplement: 41467_2024_47455_MOESM2_ESM.pdf [file 41467_2024_47455_MOESM2_ESM.pdf]

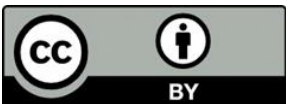

**Open Access** This file is licensed under a Creative Commons Attribution 4.0 International License, which permits use, sharing, adaptation, distribution and reproduction in any medium or format, as long as you give appropriate credit to the original author(s) and the source, provide a link to the Creative Commons license, and indicate if changes were made. In the cases where the authors are anonymous, such as is the case for the reports of anonymous peer reviewers, author attribution should be to 'Anonymous Referee' followed by a clear attribution to the source work. The images or other third party material in this file are included in the article's Creative Commons license, unless indicated otherwise in a credit line to the material. If material is not included in the article's Creative Commons license and your intended use is not permitted by statutory regulation or exceeds the permitted use, you will need to obtain permission directly from the copyright holder. To view a copy of this license, visit <http://creativecommons.org/licenses/by/4.0/>.

**Editorial Note:** This manuscript has been previously reviewed at another journal that is not operating a transparent peer review scheme. This document only contains reviewer comments and rebuttal letters for versions considered at *Nature Communications*.

## REVIEWERS' COMMENTS

Reviewer #1 (Remarks to the Author):

The revised manuscript has been modified to address the reviewer comments and questions and has been improved. I have no further comments.

Reviewer #2 (Remarks to the Author):

The authors have addressed the majority of comments raised during peer review, and have improved the quality of the manuscript as a result, specifically by including infectious titer data to support in vivo work, clarifying the relative novelty of the transmission findings in general, and providing more specificity regarding the transmission setup employed. No further comments.

Reviewer #3 (Remarks to the Author):

I raised some minor revisions previously, and this, together with the other reviewer's responses, has been adequately addressed. I have no more additional comments
